# Supplementary material for: Mesoporous silica anchored Ru catalysts for highly enantioselective hydrogenation of β-ketoesters
Source: Royal Society of Chemistry journal article supplement (doi:10.1039/b406697a), 2004-01-01
Supplement: b406697a.doc [file b406697a.doc]

# Supporting Information for

Mesoporous silica anchored Ru catalysts for highly enantioselective hydrogenation of -ketoesters

Banu Kesanli and Wenbin Lin

Department of Chemistry, CB#3290, University of North Carolina, Chapel Hill, NC 27599, USA

**Experimental Section**

**Materials and General Procedures.** All of the chemicals were obtained from commercial sources and used without further purification. All of the reactions and manipulations were carried out under Argon with the use of standard inert-atmosphere and Schlenk techniques. Solvents used in the reactions were dried by standard procedures. NMR spectra were recorded on Bruker NMR 400 DRX spectrometer. 1H-NMR spectra were recorded at 400 MHz and referenced to the proton resonance resulting from incomplete deuteration of the deuterated chloroform ( 7.26). Nitrogen adsorption experiments were performed on a Quantachrome-1C surface area analyzer at liquid nitrogen temperature. All the surface areas and the pore volumes were calculated based on BJH method. Direct current plasma (DCP) spectroscopic measurements were carried out in Department of Geological Sciences at UNC-Chapel Hill.

**Synthesis of 4-(cyclopentanol)-4’-(trimethoxysilylpropylcyclopentanol)-2,2’-bis(diphenylphosphino)-1,1’-binaphthyl (L1)**. In a 25mL Schlenk flask, 4,4’-bis(cyclopentanol)-2,2’-bis(diphenylphosphino)-1,1’-binaphthyl (395 mg, 0.5 mmol) and anhydrous THF (10 mL) were added under argon. This mixture was cooled to -78 C using a dry ice/acetone bath. After stirring at this temperature for 30 min, *n*-BuLi (2.5 M, 0.5 mL, 1.2 mmol) was slowly added *via* a syringe. The solution turned from colorless to light yellow. It was stirred at this temperature for 1 hr, and then 3-iodopropyltrimethoxy­silane (0.3 mL, 1.5 mmol) was added. The reaction mixture was stirred at this temperature for 1 hr and then warmed to room temperature and stirred at r.t. overnight. After the removal of solvents, the residue was purified by silica-gel column chromatography (ethylacetate/hexane) to give light yellow solid of the final product (95 mg, 20 %). 1H{31P} NMR (CDCl3):  8.71 (d,  3JH-H = 8.8Hz, H5), 7.50 (s, H3), 7.37 (m, 3JH-H = 8.3Hz, 3JH-H = 8.8Hz, 4JH-H = 1.0Hz, H6), 7.13 (m, Ph-*H*, 16H), 7.00 (m, Ph-*H*, 4H), 6.94 (m, H7 & H8), 4.12 (q, 3JH-H = 7.3Hz, 2H), 2.19 (m, 4H), 1.93 (m, 4H), HH 1.62(m, 4H), 1.26(t, 3JH-H = 7.3Hz, 2H) 3.58 (t, 2H, OC*H*2), 3.21 (s, 9H, OC*H*3), 2.15 (m, 2H, CH2C*H*2CH2), 0.73 (m, 2H, C*H*2Si). 31P{1H} NMR (CDCl3):  -14.48, -14.54.

**Synthesis of 4-(trimethoxysilylpropylcyclopentanol)-2,2’-bis(diphenylphosphino)-1,1’-binaphthyl (L2).** In a 25 mL Schlenk flask, 4-(cyclopentanol)-2,2’-bis(diphenylphosphino)-1,1’-binaphthyl (354mg, 0.5mmol) and anhydrous THF (10 mL) were added under argon. This mixture was cooled down to -78 C using a dry ice/acetone bath. After stirring at this temperature for 30 min, *n*-BuLi (2.5 M, 0.3 mL, 0.75 mmol) was slowly added *via* a syringe. The solution turned from colorless to light yellow and further stirred at this temperature for 1hr, and then 3-iodopropyltrimethoxysilane (0.18 mL, 0.9 mmol) was added. The reaction mixture was stirred at this temperature for 1hr and then warmed to room temperature and stirred at r.t. overnight. After the removal of solvents, and the residue was purified by silica-gel column chromatography (ethylacetate/hexane) to give light yellow solid of the final product (104 mg, 24 %). 1H{31P} NMR (CDCl3):  8.71 (d,  3JH-H = 8.8Hz, H5), 7.88 (d,  3JH-H = 8.3Hz, H5’), 7.82 (d,  3JH-H = 8.3Hz, H6’), 7.50 (s, H3), 7.45 (d,  3JH-H = 8.8Hz, H6), 7.35 (m, H3’, H4’), 7.20-7.02 (m, Ph-*H*, 16H), 6.96-6.86 (m, Ph-*H*, 4H & H7 & H8), 4.12 (q, 3JH-H = 7.3Hz, 1H), 2.20 (m, 2H), 1.93 (m, 2H), 1.62 (m, 2H), 1.27(t, 3JH-H = 7.3Hz, 1H) 3.67 (t, 2H, OC*H*2), 3.50 (s, 9H, OC*H*3), 2.03 (m, 2H, CH2C*H*2CH2), 0.71 (m, 2H, C*H*2Si). 31P{1H} NMR (CDCl3):  -14.28, -14.33.

**A Typical Procedure for the Preparation of Solid Catalysts.**

A mixture of [Ru(cymene)Cl2]2 (15.3 mg, 0.025 mmol) and **L1** (50 mg, 0.052 mmol) in anhydrous DMF (4 mL) was heated at 100C under Argon for 30 min and then cooled to 25 C. All the volatile components were removed under vacuum to give a dark red solid. This solid was refluxed with 335 mg of SBA-15, that had been dried under vacuum at 135 C for 3h, in 10 mL of toluene overnight. The solution was cooled to RT and centrifuged for 30 min, the supernatant was removed and the solid was washed with dry toluene and dried under vacuum and kept under Ar. 400 mg of solid catalyst **1** was obtained after this treatment.

**A Typical Procedure for Asymmetric Hydrogenation of -Ketoester.**

19.2 mg of catalyst **1** (2.5 mol) was weighed into a Teflon-capped vial (reaction flask) in dry box, and to this vial was added ethyl benzoylacetoacetate (24 L, 0.125 mmol) and anhydrous methanol (0.5 mL) under Argon. The vial was quickly transferred inside a stainless steel autoclave, and sealed. After purging with hydrogen for 6 times, final H2 pressure was adjusted to 1400 psi. 20 h later, H2 pressure was released and water (10 mL) was added. The hydrogenated product was extracted with diethyl ether and passed through a mini silica-gel column. The conversions were assessed based on the integration of 1H NMR peaks of the products and starting materials, while the e.e. values were determined using chiral GC or HPLC.

**Recycling and Control Experiments**

For the catalyst re-use experiment, the reaction mixture was centrifuged for 30 min and the supernatant was siphoned out. The residual solid was washed with degassed distilled methanol under a N2 gas flow. Fresh substrate and MeOH were added to the solid catalyst and another round of hydrogenation was performed.

Supernatant of after hydrogenation reaction with catalyst **1**, the reaction mixture was allowed to settle and the methanol solution was removed with a syringe under argon. The supernatant solution did not catalyze the hydrogenation of -keto esters, which unambiguously demonstrated that the reaction is heterogeneous.

**Determination of Ru Leaching Using Direct Current Plasma Spectroscopy (DCP).**

After the hydrogenation reaction (with a 2.5 μmol of **1** and 1.25 μmol **2** solid loading), the reaction mixture was extracted with 2 mL of methanol and filtered to remove small particulates. Methanol was removed under reduced pressure, and the residue was then taken into 25 mL 1N HNO3 solution. After adjusting for the amount of methanol used, we the percent Ru leaching into the methanol solution was calculated.

Table S1. DCP results for leaching of Ru

|  | **1** | **2** |
| --- | --- | --- |
| Ru(ppm) | 0.012 | 0.0047 |
| Ru leached (%) | 0.12 | 0.09 |

**Determination of Ru Content Using Direct Current Plasma Spectroscopy**

**(DCP).**

5.0 mg of **1** (containing 0.58 μmol of **L1**) and 5 mg of **2** (containing 0.81μmol of **L2**) were digested in 0.63 mL of conc HNO3 overnight. The solutions were filtered and diluted to 10 mL to make a 1N HNO3 solution.

Table S2.DCP results for %Ru loading

| Ru content | **1** | **2** |
| --- | --- | --- |
| Theoretical (%) | 7.95 | 8.52 |
| Experimental (%) | 7.81 | 8.43 |

Racemic samples were prepared using rac-Ru-BINAP as catalyst, and were used to establish GC conditions. The absolute configurations of enantio- enriched products from the present experiments were assigned based on GC to be same as those samples obtained from Ru-BINAP catalyzed reactions.

Ethyl 3-hydroxy-3-phenylpropionate: 1H NMR (CDCl3): 7.29 (m, 5H), 5.08 (m, 3JH-H = 8.6Hz, 3JH-H = 3.1Hz, 1H), 4.12 (m, 3JH-H = 7.1Hz, 2H), 3.61(br, 1H), 2.68 (m, 2JH-H = 16.2Hz, 3JH-H = 9.0Hz, 3JH-H = 3.9Hz, 2H), 1.21 (t, 3JH-H = 7.1Hz, 3H). GC (Supelco -Dex 225 30m  0.25mm  0.25m, injector: 220C, Column: from 70C to 180C programmed at 1C/min, Detector: 250C, carrier gas: He 1.0mL/min): t1 = 82.0 min; t2 = 82.5 min.

Ethyl 3-hydroxy-3-(4-methoxyphenyl)propionate: 1H NMR (CDCl3): 7.30 (d, 3JH-H = 8.6Hz, 2H), 6.88 (d, 3JH-H = 8.6Hz, 2H), 5.09 (m, 3JH-H = 9.0Hz, 3JH-H = 3.5Hz, 1H), 4.18 (q, 3JH-H = 7.0 Hz, 2H), 3.80 (s, 3H), 3.17(d, 3JH-H = 3.1Hz, 1H), 2.69 (m, 2JH-H = 16.0Hz, 3JH-H = 9.0Hz, 3JH-H = 3.5Hz, 2H), 1.26 (t, 3JH-H = 7.0Hz, 3H). SFC (Chiralpak AS, eluent: 1.5% MeOH in *sc*-CO2, column temperature: 40C, flow rate: 2mL/min): t1 = 12.6 min; t2 = 17.7 min.

Methyl 3-hydroxy-3-(4-chlorophenyl)propionate: 1H NMR (CDCl3): 7.31 (m, 4H), 5.08 (m, 3JH-H = 8.2Hz, 3JH-H = 3.9Hz, 1H), 3.72 (s, 3H), 3.37(d, 3JH-H = 3.1Hz, 1H), 2.70 (m, 2H). GC (Supelco -Dex 120 30m  0.25mm  0.25m, injector: 220C, Column: from 70C to 180C programmed at 1C/min, Detector: 250C, carrier gas: He 1.0mL/min): t1 = 108.3 min; t2 = 108.7 min.

Methyl 3-hydroxy-3-(4-fluorophenyl)propionate: 1H NMR (CDCl3): 7.34 (m, 2H), 7.03 (m, 2H), 5.11 (m, 3JH-H = 8.6Hz, 3JH-H = 3.5Hz, 1H), 3.71 (s, 3H), 3.34(d, 3JH-H = 3.1Hz, 1H), 2.70 (m, 2JH-H = 16.4Hz, 3JH-H = 8.6Hz, 3JH-H = 3.9Hz, 2H). GC (Supelco -Dex 120 30m  0.25mm  0.25m, injector: 220C, Column: from 70C to 180C programmed at 1C/min, Detector: 250C, carrier gas: He 1.0mL/min): t1 = 86.8 min; t2 = 87.3 min.

Methyl 3-hydroxy-3-(2-chlorophenyl)propionate: 1H NMR (CDCl3): 7.61 (m, 1H), 7.30 (m, 2H), 7.20 (m, 1H), 5.11 (m, 3JH-H = 9.8Hz, 3JH-H = 3.1Hz, 1H), 3.72 (s, 3H), 3.51(d, 3JH-H = 3.5Hz, 1H), 2.85 (m, 2JH-H = 16.4Hz, 3JH-H = 2.3Hz, 1H), 2.57 (m, 2JH-H = 16.4Hz, 3JH-H = 9.8Hz, 1H). HPLC (Chiralpak AD, eluent: Isopropanol:Hexane = 3:97, flow rate: 1mL/min): t1 = 14.8 min; t2 = 16.4 min.

Methyl 3-hydroxy-3-(4-trifluoromethylphenyl)propionate: 1H NMR (CDCl3): 7.61 (d, 3JH-H = 8.6Hz, 2H), 7.49 (m, 3JH-H = 8.6Hz, 2H), 5.19 (m, 1H), 3.73 (s, 3H), 3.34(d, 3JH-H = 3.5Hz, 1H), 2.74 (s, 1H), 2.72 (s, 1H). GC (Supelco -Dex 120 30m  0.25mm  0.25m, injector: 220C, Column: from 70C to 180C programmed at 1C/min, Detector: 250C, carrier gas: He 1.0mL/min): t1 = 84.9 min; t2 = 85.6 min.

Methyl 3-hydroxy-3-(3-trifluoromethylphenyl)propionate: 1H NMR (CDCl3): 7.65 (s, 1H), 7.54 (m, 2H), 7.47 (m, 1H), 5.19 (m, 3JH-H = 7.0Hz, 3JH-H = 1.3Hz, 1H), 3.72 (s, 3H), 3.60(d, 3JH-H = 3.1Hz, 1H), 2.72 (m, 1H), 2.72 (s,  3JH-H = 7.2Hz, 3JH-H = 1.5Hz, 1H). HPLC (Chiralpak AD, eluent: Isopropanol/Hexane = 5/95, flow rate: 1mL/min): t1 = 9.6 min; t2 = 10.2 min.

Methyl 3-hydroxy-3-(2-trifluoromethylphenyl)propionate: 1H NMR (CDCl3): 7.82 (d, 3JH-H = 7.8Hz, 1H), 7.61 (m, 2H), 7.39 (m, 3JH-H = 7.8Hz, 1H), H 5.55 (m, 1H), 3.75 (s, 3H), 3.55(d, 3JH-H = 2.8Hz, 1H), 2.74 (m, 2JH-H = 22.5Hz, 3JH-H = 5.7Hz, 3JH-H = 1.0Hz,, 1H). GC (Supelco -Dex 120 30m  0.25mm  0.25m, injector: 220C, Column: from 70C to 180C programmed at 1C/min, Detector: 250C, carrier gas: He 1.3mL/min): t1 = 72.3 min; t2 = 72.8 min.

Methyl 3-hydroxybutyrate: 1H NMR (CDCl3):  4.12 (m, 3JH-H = 6.2Hz, 3JH-H = 1.0Hz, 1H), 3.62 (s, 3H), 3.35 (br, 1H), 2.39 (m, 3JH-H = 2.8Hz, 3JH-H = 0.5Hz, 2H), 1.14 (d, 3JH-H = 6.2Hz, 3H). GC (Supelco -Dex 225 30 m  0.25 mm  0.25 m; Injector: 220C; Column: 70C (Isothermal); Detector: 250C; Carrier gas: He 1.0mL/min): t1 = 24.7 min; t2 = 26.8 min.

*Iso*-propyl 3-hydroxybutyrate: 1H NMR (CDCl3): 4.97 (m, 3JH-H = 6.3Hz, 1H), 4.12 (m, 3JH-H = 6.3Hz, 1H), 3.30 (br, 1H), 2.34 (m, 2H), 1.18 (d, 3JH-H = 6.3Hz, 6H), 1.15 (d, 3JH-H = 6.3Hz, 3H). GC (Supelco -Dex 225 30m  0.25mm  0.25m; Injector: 220C; Column: 65C (Isothermal); Detector: 250C; Carrier gas: He 1.2mL/min): t1 = 32.2 min; t2 = 33.4 min.

*Tert*-butyl 3-hydroxybutyrate: 1H NMR (CDCl3): 4.97 (m, 3JH-H = 6.3Hz, 3JH-H = 8.6Hz, 3JH-H = 3.9Hz, 1H), 3.20 (br, 1H), 2.34 (m, 2JH-H = 16.4Hz, 3JH-H = 8.6Hz, 3JH-H = 3.9Hz, 2H), 1.44 (s, 9H), 1.17 (d, 3JH-H = 6.3Hz, 3H). GC (Supelco -Dex 225 30m  0.25mm  0.25m; Injector: 220C; Column: 65C (Isothermal); Detector: 250C; Carrier gas: He 1.2mL/min): t1 = 34.8 min; t2 = 35.8 min.

Methyl 2,2-dimethyl-3-hydroxybutyrate: 1H NMR (CDCl3): 3.8 (m, 3JH-H = 6.7Hz, 1H), 3.64 (s, 3H), 2.84 (br, 1H), 1.11 (s, 6H), 1.07 (d, 3JH-H = 6.7Hz, 3H). GC (Supelco -Dex 225 30m  0.25mm  0.25m; Injector: 220C; Column: Programmed from 60C to 120C at 1.5C/min; Detector: 250C; Carrier gas: He 1.2mL/min): t1 = 32.2 min; t2 = 33.4 min.


